# **Nus factors have a widespread regulatory function in bacteria**

2

3 Gabriele Baniulyte<sup>1,2</sup>, Navjot Singh<sup>1</sup>, Courtney Benoit<sup>1</sup>, Richard Johnson<sup>1,2</sup>, Robert Ferguson<sup>1</sup>, Mauricio

4 Paramo<sup>1</sup>, Anne M. Stringer<sup>1</sup>, Ashley Scott<sup>1</sup>, Pascal Lapierre<sup>1</sup>, and Joseph T. Wade<sup>1,2,3</sup>

5

6 <sup>1</sup>Wadsworth Center, New York State Department of Health, Albany, New York, USA.

7 <sup>2</sup>Department of Biomedical Sciences, School of Public Health, University at Albany, Albany, New York, USA.

8 <sup>3</sup>Corresponding author: joseph.wade@health.ny.gov

9

## ABSTRACT

Nus factors are broadly conserved across bacterial species, and are often essential for viability. A complex of five Nus factors (NusB, NusE, NusA, NusG and SuhB) is considered to be a dedicated regulator of ribosomal RNA folding, and has been shown to prevent Rho-dependent transcription termination. We have established the first cellular function for the Nus factor complex beyond regulation of ribosomal assembly: repression of the Nus factor-encoding gene, *suhB*. This repression occurs by translation inhibition followed by Rho-dependent transcription termination. Thus, Nus factors can prevent or promote Rho activity depending on the gene context. Extensive conservation of NusB/E binding sites upstream of *nus* factor genes indicates that Nus factor autoregulation likely occurs in many species. Putative NusB/E binding sites are also found upstream of many other genes in diverse species, and we demonstrate Nus factor regulation of one such gene in *Citrobacter koseri*. We conclude that Nus factors have an evolutionarily widespread regulatory function beyond ribosomal RNA, and that they are often autoregulatory.

## INTRODUCTION

Nus factors are widely conserved in bacteria and play a variety of important roles in transcription and translation<sup>1</sup>. The Nus factor complex comprises the four classical Nus factors, NusA, NusB, NusE (ribosomal protein S10), NusG, and a recently discovered member, SuhB. As a complex, Nus factors serve an important role in promoting expression of ribosomal RNA (rRNA)<sup>2,3</sup>. A NusB/E complex binds BoxA sequence elements in nascent rRNA, upstream of the 16S and 23S genes<sup>4,5</sup>. Once bound to BoxA, NusB/E has been proposed to interact with elongating RNAP via the NusE-NusG interaction<sup>6</sup>. The role of NusA in Nus complex function is unclear, but may involve binding of NusA to RNA flanking the BoxA<sup>7</sup>. Early studies of Nus factors focused on their role in preventing both Rho-dependent and intrinsic termination of  $\lambda$  bacteriophage RNAs (“antitermination”)<sup>8</sup>, which is completely dependent on the bacteriophage protein N. Nus factors can prevent Rho-dependent termination in the absence of N<sup>9,10</sup>, and for many years, Nus factors were believed to prevent Rho-dependent termination of rRNA<sup>8</sup>. However, it was recently shown that rRNA is intrinsically resistant to Rho termination, and that the primary role of Nus factors at rRNA is to promote proper RNA folding during ribosome assembly<sup>3,11</sup>.

The most recently discovered Nus factor, SuhB, has been proposed to stabilize interactions between the NusB/E-bound BoxA and elongating RNAP, thus contributing to proper folding of rRNA<sup>11</sup>. Genome-wide approaches revealed that *suhB* is upregulated in the presence of the Rho inhibitor bicyclomycin, suggesting that *suhB* is subject to premature Rho-dependent transcription termination<sup>12,13</sup>. Surprisingly, *suhB* is also one of the most upregulated genes in  $\Delta nusB$  cells<sup>11</sup>, suggesting a possible autoregulatory function for Nus factors. Moreover, autoregulation of *suhB* has been suggested previously<sup>14</sup>, although the mechanism for this regulation is unclear. Here, we show that *suhB* is translationally repressed by Nus factors, which in turn leads to premature Rho-dependent transcription termination. This represents a novel mechanism for control of premature Rho-dependent termination, and is the first described cellular function for Nus factors beyond regulation of rRNA. Moreover, the role of Nus factors at *suhB* is to *promote* Rho-dependent termination of *suhB*, in contrast to their

established function in antagonizing Rho. Bioinformatic analysis suggests that regulation by Nus factors is widespread, and that autoregulation of *suhB*, *nusE* or *nusB* is a common phenomenon. We confirm Nus factor association with *suhB* mRNA in *Salmonella enterica*, and we demonstrate Nus factor regulation of an unrelated gene in *Citrobacter koseri*. Thus, our data show that Nus factors are important regulators with diverse targets and diverse regulatory mechanisms.

## RESULTS

### Rho-dependent termination within the *suhB* gene

Genome-wide analysis of Rho termination events suggested Rho-dependent termination within the *E. coli suhB* gene<sup>12,13</sup>. To confirm this, we used Chromatin Immunoprecipitation (ChIP) coupled with quantitative PCR (ChIP-qPCR) to determine RNAP association across the *suhB* gene in wild-type cells and cells expressing a mutant Rho (R66S) that is expected to be defective in RNA loading. In wild-type cells, we observed a large decrease in RNAP association 3' end of *suhB* relative to the 5' end. This decrease was substantially reduced in *rho* mutant cells (Fig. 1). Thus, our ChIP data independently support the observation of Rho termination within *suhB*<sup>12,13</sup>.

### Nus factors are *trans*-acting regulators of *suhB*

Based on an approach used to identify modulators of Rho-dependent termination within *S. enterica chiP*<sup>15</sup>, we used a genetic selection to isolate 30 independent mutants defective in Rho-dependent termination within *suhB* (see Methods). All 30 strains isolated had a mutation in one of three genes: *nusB* (14 mutants), *nusE* (13 mutants) or *nusG* (3 mutants) (Table S1). We then measured RNAP association across the *suhB* gene in wild-type,  $\Delta nusB$  and *nusE* mutant cells (*nusE* A12E mutant isolated from the genetic selection). Mutation of *nusB* or *nusE* increased RNAP binding at the *suhB* 3' end ~4-fold compared to wild-type cells (Fig. 1 and S1). We conclude that Nus factors promote Rho-dependent termination within the *suhB* gene. However, RNAP occupancy at the 3' end of *suhB* in *nusB* and *nusE* mutants was substantially lower than in the *rho* mutant (Fig. 1 and S1). This difference may be due to spurious, non-coding transcripts arising from nearby intragenic promoters, which are widespread in *E. coli*<sup>16</sup> and are often terminated by Rho<sup>12,13</sup>.

To determine the approximate location of Nus-factor promoted Rho-dependent termination within *suhB* we measured RNAP association at six positions within the gene in wild-type,  $\Delta nusB$ , *nusE* A12E, and *rho* R66S mutant cells. We detected a clear increase in RNAP occupancy at position ~+400 within the *suhB* gene in *nusB*

and *nusE* mutant cells compared to wild-type cells (Fig. S1), suggesting that Rho-dependent termination occurs upstream of this position.

### **A functional BoxA in the *suhB* 5' UTR**

We identified a sequence in the *suhB* 5' UTR with striking similarity to *boxA* sequences from rRNA loci (Fig. S2). Moreover, this *boxA*-like sequence is broadly conserved across *Enterobacteriaceae* species (Fig. 2A and S3), suggesting that it is a genuine binding site for NusB/E. We generated a library of mutant *suhB-lacZ* transcriptional fusions (see Methods), and identified fusions that had higher expression of *lacZ*. All identified mutants carried a single nucleotide change at one of five different positions within the putative *boxA* (Fig. 2B). We then constructed a strain carrying two chromosomal point mutations in the putative *suhB boxA* (C4T/T6C; numbers corresponding to the position in the consensus *boxA*; Fig. S2). We used ChIP-qPCR to measure association of FLAG-tagged SuhB at the 5' end of the *suhB* gene in wild-type cells, or cells containing the *boxA* mutation. We detected robust association of SuhB-FLAG in wild-type cells, but not in the *boxA* mutant strain (Fig. 2C). We conclude that the putative BoxA in the 5' UTR of *suhB* is genuine, and recruits Nus factors. To test whether the BoxA controls Rho-dependent termination within *suhB*, we measured RNAP occupancy across *suhB* in the *boxA* mutant strain. We detected a ~4-fold increase in RNAP occupancy in the downstream portion of *suhB* in the *boxA* mutant strain relative to wild-type cells, mirroring the effect of mutating *nusB* or *nusE* (Fig. 1). Our data support a model in which Nus factor recruitment by the *suhB* BoxA leads to Rho-dependent termination within the gene.

### **BoxA-mediated translational repression of *suhB* leads to intragenic Rho-dependent transcription termination**

The *suhB* BoxA is separated by only 6 nt from the Shine-Dalgarno (S-D) sequence (Fig. 2A). Rho cannot terminate transcription of translated RNA, likely because RNAP-bound NusG interacts with ribosome-associated NusE (S10) <sup>6</sup>. Hence, we hypothesized that NusB/E association with BoxA sterically blocks

association of the 30S ribosome with the mRNA, repressing translation initiation, uncoupling transcription and translation, and thereby promoting Rho-dependent termination. To test this hypothesis, we used the *suhB-lacZ* transcriptional fusion (Fig. 3A), as well as an equivalent translational fusion (Fig. 3B). We reasoned that mutation of *nusB*, *nusE*, or *boxA* would result in increased expression from both reporter fusions, since these mutations would relieve translational repression (reported by the translational fusion), which in turn would reduce Rho-dependent termination (reported by the transcriptional fusion). In contrast, we reasoned that mutation of *rho* would result in increased expression only from the transcriptional fusion reporter, since the SuhB-LacZ fusion protein (from the translational fusion construct) would still be translationally repressed. We measured expression of *lacZ* from each of these reporter fusions in wild-type cells, and cells with  $\Delta nusB$ , *nusE* A12E, or *rho* R66S mutations. We also measured expression of *lacZ* in these strains using reporter fusions carrying the C4T/T6C *boxA* mutation. Consistent with our model, we detected increased expression of both reporter fusion types in mutants of *nusB*, *nusE* or *boxA*, whereas mutation of *rho* resulted in increased expression of the transcriptional fusion but not the translational fusion reporter (Fig. 3A-B). Note that mutation of *nusB*, *nusE* or *boxA* does not lead to the same level of increase in expression of the reporter fusions (Fig. 3A-B). This is likely due to the fact that mutations in Nus factors have extensive pleiotropic effects, presumably due to the importance of Nus factors in ribosome assembly<sup>3</sup>. Moreover, mutation of *boxA* in a *nusE* mutant leads to a further increase in reporter expression, whereas mutation of *boxA* in a *nusB* mutant does not (Fig. 3A-B). This is likely due to the mutant NusE retaining partial function, whereas deletion of *nusB* completely abolishes Nus factor function.

To confirm the effects of mutating *nusB*, *nusE*, *rho* and *boxA* on expression of *suhB* in the native context, we measured SuhB protein levels by Western blotting using strains expressing a C-terminally FLAG-tagged derivative of SuhB. We compared SuhB protein levels in cells with *nusE* A12E, *rho* R66S, or *boxA* C4T/T6C mutations; we have previously shown that SuhB protein levels are increased in a  $\Delta nusB$  mutant<sup>11</sup>. SuhB protein levels in the mutant strains correlated well with the translational *suhB-lacZ* fusion reporter gene assay: mutation

of *nusA*, *nusE* or *boxA* caused a modest increase in SuhB-FLAG levels, whereas mutation of *rho* had no discernible effect (Fig. 3C-D).

### **BoxA-mediated occlusion of the S-D sequence is not due to steric occlusion**

The data described above are consistent with a steric occlusion model, but do not rule out other mechanisms of translational repression. The steric occlusion model predicts that increasing the distance between the *boxA* and S-D elements would relieve translational repression, and consequently Rho-dependent termination, of *suhB*. We constructed *suhB-lacZ* transcriptional fusions that carried insertions of sizes from 2 to 100 nt between the BoxA and S-D sequences (see Methods for details). We constructed equivalent fusions carrying a *boxA* mutation (C4A; Fig. S2). Surprisingly, separating the BoxA and S-D sequences with <100 nt intervening RNA did not abolish BoxA-mediated repression (Fig. 4A). In contrast, insertion of 100 nt largely abolished repression (Fig. 4A). Note that differences in absolute expression levels for the different constructs are likely due to variability in secondary structure around the ribosome binding site. Additionally, the apparent loss of repression with a 100 nt insertion is not due to the inadvertent inclusion of promoters within the inserted sequence, since a similar construct lacking an active promoter was only weakly expressed (Fig. S2). We conclude that the steric occlusion model is insufficient to explain BoxA-mediated translational repression of *suhB*, although the proximity of the BoxA and S-D sequences suggests that simple occlusion would prevent ribosome binding.

We reasoned that if steric occlusion of ribosomes by NusB/E binding is sufficient for repression of *suhB*, it would not require assembly of a complete Nus factor complex, since NusB/E alone has a high affinity for BoxA RNA<sup>4</sup>. Hence, we constructed *suhB-lacZ* translational fusions where the native promoter is replaced by a T7 promoter. Previous studies showed that gene regulation involving  $\lambda$  N or NusG is lost when *E. coli* RNAP is substituted with bacteriophage T7 RNAP<sup>17-19</sup>, suggesting that T7 RNAP does not interact with Nus factors; hence, transcription of this *suhB-lacZ* fusion by T7 RNAP would not be associated with formation of a complete Nus factor complex. We detected robust expression that was dependent upon expression of T7 RNAP



in the same cells. However, we observed no effect on expression of mutating the *boxA* (Fig. 4B). We conclude that efficient BoxA-dependent repression of *suhB* requires assembly of a complete Nus factor complex.

### ***Salmonella enterica* *suhB* has a functional BoxA**

Phylogenetic analysis of the region upstream of the *suhB* gene indicates that the *boxA* sequence is widely conserved among members of the family *Enterobacteriaceae* (Fig. 2A; Fig. S2-3), suggesting that BoxA-mediated regulation of *suhB* occurs in these species. To investigate this possibility, we used ChIP of FLAG-tagged SuhB to measure association of SuhB with the *suhB* upstream region in *S. enterica* subspecies *enterica* serovar Typhimurium. We detected robust association of both RNAP ( $\beta$  subunit) and SuhB with the *suhB* upstream region (Fig. 5A-D), indicating that the *suhB* mRNA contains a functional BoxA. We also measured SuhB association with the *hisG* gene, since earlier studies reported a functional BoxA within the mRNA (Fig. S2)<sup>20,21</sup>. This putative BoxA was reported as being functional only when *hisG* translation was abolished by mutation of the gene. Hence, we interrupted *hisG* upstream of the putative *boxA* by inserting the *thyA* gene 3 bp or 100 bp downstream of the start codon (Fig. 5A-D). Although we detected robust association of RNAP close to the site of the putative *boxA*, we did not detect any association of SuhB (Fig. 5B and 5D), strongly suggesting that this is not a functional *boxA*. Consistent with these data, the putative *boxA* in *hisG* differs from the consensus *boxA* sequence at a critical position (Fig. S2). Mutations at this position have been shown previously to abolish Nus factor association with a BoxA-containing RNA *in vivo* and *in vitro*<sup>5,22</sup>. Moreover, we isolated mutations in the *suhB* *boxA* at the equivalent position when screening for loss of repression (Fig. 2B).

### **BoxA-mediated regulation and Nus factor autoregulation are phylogenetically widespread phenomena**

Aside from their role in lambdoid phage, Nus factors have historically been considered dedicated regulators of rRNA expression. Our discovery of *suhB* as a novel regulatory target of Nus factors suggests that BoxA-mediated regulation may be more extensive. BoxA sequences in rRNA are known to be highly conserved<sup>2</sup>. Based on the *boxA* sequences from *E. coli* rRNA and *suhB* loci, and a previous analysis of sequences required

for BoxA function in *E. coli*<sup>5</sup>, we derived a consensus sequence (GYTCTTTAANA) that is likely to be applicable to almost all  $\gamma$ -proteobacteria<sup>2</sup>. We searched for perfect matches to this sequence in 940 sequenced  $\gamma$ -proteobacterial genomes. We then selected sequence matches that are positioned within 50 bp of a downstream start codon. Thus, we identified 571 putative BoxA sequences, with between 0 and 7 instances per genome (mean of 0.61; Table S2). We determined whether any gene functions were identified from multiple genomes. To minimise biases from the uneven distribution of genome sequences across different genera, we analysed gene functions at the genus rather than species level. Across all the species analysed, we identified 36 different gene functions with at least one representative from one genus. Strikingly, we identified 34 of 55 genera in which at least one species has a putative *boxA* sequence within 50 bp of the start of an annotated *suhB* homologue. We identified three additional genera in which at least one species has a putative *boxA* within 50 bp of the start of an unannotated *suhB* homologue, and one genus with a species in which the *suhB* homologue has a putative *boxA* 82 bp from the gene start. Thus, our analysis reinforces the notion that BoxA-mediated regulation of *suhB* is highly conserved (Fig. 2A and S4). Three other gene functions were represented in multiple genera: *prsA* (encodes ribose-phosphate pyrophosphokinase) and *rpsJ* (encodes NusE) were each found in three genera, and genes encoding ParE-like toxins were found in two genera. We also identified two genera with species in which *rpsJ* is predicted to be a downstream gene in an operon where the first gene in the operon has a putative *boxA* <50 bp from the gene start.

## **BoxA-mediated regulation of a toxin-antitoxin system in *Citrobacter koseri***

Bioinformatic analysis strongly suggested that BoxA-mediated regulation is evolutionarily widespread and extends to genes other than *suhB*. To determine whether Nus factors regulate genes other than rRNA and *suhB* in other species, we selected one putative BoxA-regulated gene identified by the bioinformatic search for *boxA*-like sequences: *CKO\_00699* from *C. koseri* (Fig. S2). *CKO\_00699* is predicted to encode a ParE-like toxin, part of a putative toxin-antitoxin pair. A putative *boxA* was observed upstream of a homologous gene in *Pasteurella multocida*, suggesting conserved BoxA-mediated regulation. We reasoned that if *CKO\_00699* is a genuine

target of Nus factors, it would likely retain this regulation in *E. coli*, since Nus factors are highly conserved between *C. koseri* and *E. coli* (e.g. the amino acid sequence of NusB is 97% identical and 100% similar between the two species). Hence, we constructed a transcriptional fusion of *CKO\_00699* to *lacZ* and measured expression in *E. coli*. Note that we included a mutation in *CKO\_00699* (R82A) to inactivate the predicted toxin activity to prevent growth inhibition. The *lacZ* fusion included a strong, constitutive promoter<sup>23</sup>, and the sequence from *C. koseri* began at the predicted transcription start site, based on manual analysis of likely promoter sequences (Fig. 5E). We measured expression of fusions with wild-type and mutant *boxA* (C4A) sequences (Fig. S2), in wild-type and  $\Delta nusB$  strains. Mutation of the putative *boxA*, or deletion of *nusB* resulted in a substantial increase in expression, whereas mutation of the *boxA* did not affect expression in the  $\Delta nusB$  strain (Fig. 5E). We conclude that *CKO\_00699* is directly repressed by a BoxA and Nus factors.

## DISCUSSION

### A model for BoxA-mediated repression of *suhB*

We have shown that premature Rho-dependent termination within the *suhB* gene is controlled by a BoxA and Nus factors. This likely serves as a mechanism for autoregulation of Nus factors, since SuhB is a critical component of the Nus machinery<sup>11</sup>. Premature Rho-dependent termination of mRNAs has been recently recognized to be a widespread regulatory mechanism<sup>24,25</sup>. Most regulation of this type occurs by alteration of mRNA accessibility around Rho-loading (“*rut*”) sites. In the case of *suhB*, we presume that translational repression by Nus factors prevents occlusion of a gene-internal *rut* site by translating ribosomes.

A function for Nus factors in promoting Rho-dependent termination is particularly striking because of their long association with antitermination<sup>8</sup>. The contrasting effects of Nus factors on Rho-dependent termination in different contexts, and their role in promoting ribosomal assembly, highlight the flexibility in the function of these proteins. Our data indicate that translational repression of *suhB* by Nus factors is not due to occlusion of the S-D. Previous studies of Nus factors suggest that they form a loop between the BoxA in the RNA and the elongating RNAP<sup>3,11</sup>. We propose that this loop prevents the 30S ribosome from accessing the S-D. Alternatively, association of NusG with NusE in the context of the Nus factor complex may prevent translation by blocking association of NusG with ribosome-associated NusE (S10). However, we favour a looping model because insertion of 100 bp between the *boxA* and the Shine-Dalgarno sequence greatly reduces repression (Fig. 4A).

Autoregulation of SuhB is strikingly similar to autoregulation of  $\lambda$  N.  $\lambda$  *nutL* is positioned ~200 bp upstream of the *N* gene. Binding of Nus factors and N to NutL results in translational repression of N<sup>26</sup>. The distance between NutL and the S-D sequence is such that a simple steric occlusion model is insufficient to explain translational repression by N and Nus factors; the RNA loop formed between NutL and the elongating RNAP provides a straightforward explanation of repression. Although the gap between NutL and the S-D sequence for

the *N* gene is considerably longer than the longest distance we tested for *suhB* (Fig. 4A and S2), the intervening sequence is highly structured<sup>27</sup>, which may impact the compactness of the loop.

Although we have shown previously that Nus factors are not required to prevent Rho-dependent termination at rRNA loci<sup>11</sup>, Nus factors have been shown to prevent Rho-dependent termination in artificial reporter constructs<sup>9,10,28,29</sup>. Our finding that Nus factors promote Rho-dependent termination in *suhB* further indicates that context determines the precise function of Nus factors. Hence, it is likely that there are additional sequence elements in *suhB* that promote Rho-dependent termination, or that there are additional sequence elements in the artificial reporter constructs that prevent Rho-dependent termination.

### **BoxA-mediated regulation beyond rRNA**

Our data support a widespread regulatory role for Nus factors, implicating them in regulation in both a wide range of species, and of a diverse set of genes. Strikingly, ~25% of the gene functions associated with an upstream *boxA* are known to be directly connected to translation. This is consistent with the established connection between Nus factors and ribosomal assembly<sup>3</sup>, and suggests that the impact of Nus factors on translation occurs by regulation of a variety of genes. Moreover, our data strongly suggest that NusE is autoregulated in phylogenetically diverse species. Although we did not identify any genomes where genes encoding other Nus factors have putative upstream *boxA* sequences, we did identify a putative *boxA* sequence upstream of *ribH* in six different species of *Pseudomonas*. In all cases, *nusB* is the gene immediately downstream of *ribH*, suggesting that *nusB* is autoregulated in pseudomonads. Overall, we identified no species with a putative *boxA* upstream of more than one Nus factor-encoding gene, and only 11 genera had no putative *boxA* associated with any Nus factor-encoding gene. However, for five of these latter genera we were unable to identify a *boxA* sequence upstream of the rRNA genes, suggesting that the BoxA consensus is different to that in *E. coli*. Thus, our data strongly suggest that Nus factor autoregulation occurs in ~90% of gamma-proteobacterial species, and that typically, just one Nus factor is autoregulated. The strong evidence for

autoregulation of SuhB, NusE and NusB, suggests that the levels of these proteins contribute to feedback loops that control the primary function of Nus factors: promoting ribosomal assembly. Our observation of BoxA-mediated regulation of a ParE-like toxin in *C. koseri* demonstrates that Nus factors regulate genes other than their own. Indeed, our bioinformatic analysis suggests that genes of many functions may be regulated by Nus factors, with 36 gene functions represented in at least one genus. Our list is likely to be conservative because (i) it does not consider the possibility of regulation by BoxA sequences located >50 nt upstream of the gene start, which we know is possible (Fig. 4A), and (ii) the BoxA consensus may be different in some of the species analysed.

## Conclusions

Our data indicate that regulation by Nus factors extends to many genes beyond rRNA, and that Nus factor autoregulation is an evolutionarily widespread phenomenon. Moreover, we have shown that Nus factors can provide contrasting forms of regulation, depending on the context of the target, despite their long-established function in antitermination<sup>8</sup>, Nus factors promote Rho-dependent termination within *suhB*. Key questions about the function of Nus factors remain to be addressed. What is the molecular architecture of the Nus factor machinery? What are the specific RNA sequences that determine whether Nus factors prevent Rho-dependent termination? How do Nus factors modulate the function of elongating RNAP? Our identification of novel Nus factor target genes with novel regulatory mechanisms provides an excellent opportunity to address these questions.

## MATERIALS AND METHODS

### Strains and plasmids

All strains, plasmids and oligonucleotides used in this study are listed in Table S3 and Table S4. Mutations in *rpsJ* and *rho* were P1 transduced into MG1655<sup>30</sup>, MG1655  $\Delta lacZ$  (AMD054)<sup>31</sup> and MG1655*suhB*-FLAG<sub>3</sub> (VS066)<sup>11</sup>. *E. coli* MG1655*suhB*(*boxA*(C4T/T6C)), MG1655*suhB*(*boxA*(C4T/T6C))-FLAG<sub>3</sub>, and *S. Typhimurium* *hisG* $\Delta$ +3::*thyA*, *hisG* $\Delta$ +100::*thyA* *suhB*-FLAG<sub>3</sub> strains were constructed using FRUIT<sup>32,33</sup>.

Plasmids pGB1-pGB36, pGB67-68 were constructed by cloning the *suhB* gene and 200 bp of upstream sequence into the pAMD-BA-*lacZ* plasmid<sup>31</sup>, creating transcriptional or translational fusions to *lacZ*. Fusions carrying *boxA* mutations were made by amplifying a *suhB* fragment from GB023 (*boxA*(C4T/T6C)) or by Site-directed mutagenesis (*boxA*(C4A)). Insertions between the *boxA* and S-D sequences were generated by cloning fragments of random non-coding sequence ('GAACTACCCATCTGGTCGCAGATAGTATGAAC'), modified from<sup>34</sup>, for insertions of up to 32 bp; 40-100 bp insertions carried a non-coding sequence from the 16S RNA gene in the reverse orientation (region from +1281 to +1380). The 5' end of the insert remained the same, and inserted sequence was extended towards the S-D element. Plasmid pGB116 was made by cloning T7 RNAP gene with S-D into pBAD18 vector<sup>35</sup>. Plasmids pGB83-95 carried *suhB* gene and 36 nt of the 5'UTR with wt or mutant *boxA*, and 100 nt insertion between the BoxA and S-D elements, where indicated. *suhB* was under the control of pT7 promoter and was translationally fused to *lacZ* reporter on pAMD-BA-*lacZ* plasmid<sup>31</sup>. Plasmids pGB109-110 were made by cloning CKO\_00699(R82A) gene with wt or mutant *boxA* (C4A) and a constitutive promoter<sup>23</sup>; the toxin gene was transcriptionally fused to *lacZ* reporter on pAMD-BA-*lacZ* plasmid.

### Isolation and identification of *trans*- and *cis*-acting mutants

The *trans*-acting mutant genetic selection was performed using pAMD115 plasmid carrying a *suhB-lacZ* transcriptional fusion in MG1655  $\Delta lacZ$ . Bacterial cultures were grown at 37 °C in LB medium. 100  $\mu$ L of an overnight culture was washed and plated on M9 + 0.2% lactose agar. Spontaneous survivors were first tested for

increased plasmid copy number using qPCR, comparing the Ct values of plasmid and chromosomal amplicons. Strains with increased copy number were discarded. To eliminate plasmid mutants, plasmids were isolated and transformed into a clean MG1655  $\Delta lacZ$  background and plated on MacConkey agar indicator plates; mutants forming red colonies (upregulated *su hB-lacZ*) were discarded. Chromosomal mutations were identified either by whole-genome sequencing, as described previously<sup>11</sup>, or by PCR amplification and sequencing of *nusB*, *nusE* and *nusG*. The *cis*-acting mutant genetic screen was performed by cloning a mutant *su hB* DNA library, generated by an error-prone DNA polymerase Taq (NEB) with oligonucleotides JW3605 and JW3606, into the pAMD-BA-*lacZ* vector, which was transformed into EPI300 background (*lac*<sup>-</sup>; Epicentre). We selected mutants that were visibly upregulated on MacConkey agar plates and sequenced the insert to identify mutations.

## ChIP-qPCR

Bacteria were grown at 37 °C in LB medium until OD<sub>600</sub>=0.5-0.6. ChIP-qPCR was performed as described previously<sup>31</sup>, using monoclonal mouse anti-RpoB (Neoclone #W0002) and M2 monoclonal anti-FLAG (Sigma) antibodies. Occupancy units were calculated as described previously<sup>11</sup>, normalizing to transcriptionally silent regions within the *bglB* or *ynbB* genes in *E. coli*, and the *sbcC* gene in *S. Typhimurium*.

## β-galactosidase assays

Bacterial cultures were grown at 37 °C in LB medium to an OD<sub>600</sub> of 0.5-0.6. 100 μL of culture was used for β-galactosidase assays, as described previously<sup>31</sup>. LB medium was supplemented with 0.2% arabinose when pBAD18 or its derivatives were used. β-galactosidase activity units were calculated as 1000 X (A<sub>420</sub>/(A<sub>600</sub>)(time<sub>min</sub>)).

## Western Blotting

Bacteria were grown at 37 °C in LB to an OD<sub>600</sub> of 0.5-0.6. Cell pellets were boiled in gel loading dye, separated on gradient polyacrylamide gels (Bio-Rad), and transferred to a PVDF membrane (Thermo



Scientific). The membrane was probed with control mouse monoclonal anti-RpoC (BioLegend) antibody at 1:4000 dilution, or mouse monoclonal M2 anti-FLAG (Sigma) antibody at 1:10000 dilution. Goat anti-mouse horseradish peroxidase-conjugated antibody was used for secondary probing at 1:20000 dilution. Blots were developed with Clarity™ Western ECL Substrate (Bio-Rad).

### Sequence alignment of *suhB* upstream regions

We extracted 100 bp of upstream sequence for *suhB* homologues in 19 species of the family *Enterobacteriaceae*, and aligned the sequences using MUSCLE<sup>36</sup> (Fig. S4). To determine the % match to *E. coli* at each position, we added 1 to the number of perfect matches (to account for the *E. coli* sequence), divided by 20 (to account for the 20 species in the alignment), and converted to a percentage.

### Identification of putative *boxA* sequences in $\gamma$ -proteobacterial genomes

We searched all sequenced  $\gamma$ -proteobacterial genomes for annotated protein-coding genes with the sequence GYTCTTTAANA within the 50 nt upstream of the annotated gene start. We compared gene functions using COG annotations<sup>37</sup>.

## ACKNOWLEDGEMENTS

We thank Dave Grainger, Don Court, Todd Gray and Keith Derbyshire for helpful discussions and comments on the manuscript. This work was supported by the NIH Director's New Innovator Award Program, 1DP2OD007188 (JTW).

# REFERENCES

1. Peters, J.M., Vangeloff, A.D. & Landick, R. Bacterial transcription terminators: the RNA 3'-end chronicles. *J. Mol. Biol.* **412**, 793-813 (2011).
2. Arnvig, K.B. et al. Evolutionary comparison of ribosomal operon antitermination function. *J. Bacteriol.* **190**, 7251-7257 (2008).
3. Bubunenko, M. et al. Nus transcription elongation factors and RNase III modulate small ribosome subunit biogenesis in *Escherichia coli*. *Mol. Microbiol.* **87**, 382-393 (2012).
4. Luo, X. et al. Structural and functional analysis of the *E. coli* NusB-S10 transcription antitermination complex. *Mol. Cell* **32**, 791-802 (2008).
5. Nodwell, J.R. & Greenblatt, J. Recognition of boxA antiterminator RNA by the *E. coli* antitermination factors NusB and ribosomal protein S10. *Cell* **72**, 261-268 (1993).
6. Burmann, B.M. et al. A NusE:NusG complex links transcription and translation. *Science* **328**, 501-504 (2010).
7. Prasch, S. et al. RNA-binding specificity of *E. coli* NusA. *Nucleic Acids Res.* **37**, 4736-4742 (2009).
8. Sen, R., Chalissery, J., Muteeb, G. & Sep;3(1), E.P. Nus Factors of *Escherichia coli*. *EcoSal Plus* **3**(2008).
9. Li, S.C., Squires, C.L. & Squires, C. Antitermination of *E. coli* rRNA transcription is caused by a control region segment containing lambda nut-like sequences. *Cell* **38**, 851-860 (1984).
10. Torres, M., Balada, J.M., Zellars, M., Squires, C. & Squires, C.L. In vivo effect of NusB and NusG on rRNA transcription antitermination. *J. Bacteriol.* **186**, 1304-1310 (2004).

- 31 11. Singh, N. et al. SuhB Associates with Nus Factors To Facilitate 30S Ribosome Biogenesis in  
32 *Escherichia coli*. *mBio* **7**, e00114-16 (2016).
- 33 12. Peters, J.M. et al. Rho directs widespread termination of intragenic and stable RNA transcription. *Proc.*  
34 *Natl. Acad. Sci. U.S.A.* **106**, 15406-15411 (2009).
- 35 13. Peters, J.M. et al. Rho and NusG suppress pervasive antisense transcription in *Escherichia coli*. *Genes.*  
36 *Dev.* **26**, 2621-2633 (2012).
- 37 14. Inada, T. & Nakamura, Y. Autogenous control of the *su hB* gene expression of *Escherichia coli*.  
38 *Biochimie* **78**, 209-212 (1996).
- 39 15. Bossi, L., Schwartz, A., Guillemardet, B., Boudvillain, M. & Figueroa-Bossi, N. A role for Rho-  
30 dependent polarity in gene regulation by a noncoding small RNA. *Genes Dev.* **26**, 1864-1873 (2012).
- 31 16. Wade, J.T. & Grainger, D.C. Pervasive transcription: illuminating the gloomy corners of bacterial  
32 transcription *Nature Rev. Microbiol.* **12**, 647-653 (2014).
- 33 17. Wilson, H.R., Zhou, J.G., Yu, D. & Court, D.L. Translation repression by an RNA polymerase  
34 elongation complex. *Mol Microbiol* **53**, 821-8 (2004).
- 35 18. Pasman, Z. & von Hippel, P.H. Regulation of rho-dependent transcription termination by NusG is  
36 specific to the *Escherichia coli* elongation complex. *Biochemistry* **39**, 5573-5585 (2000).
- 37 19. Barik, S., Ghosh, B., Whalen, W., Lazinski, D. & Das, A. An antitermination protein engages the  
38 elongating transcription apparatus at a promoter-proximal recognition site. *Cell* **50**, 885-899 (1987).
- 39 20. Carlomagno, M.S. & Nappo, A. The antiterminator NusB enhances termination at a sub-optimal Rho  
30 site. *J. Mol. Biol.* **309**, 19-28 (2001).

21. Carlomagno, M.S. & Nappo, A. NusA modulates intragenic termination by different pathways. *Gene* **308**, 115-28 (2003).
22. Berg, K.L., Squires, C.L. & Squires, C. Ribosomal RNA operon anti-termination. Function of leader and spacer region box B-box A sequences and their conservation in diverse micro-organisms. *J. Mol. Biol.* **209**, 345-358 (1989).
23. Burr, T., Mitchell, J., Kolb, A., Minchin, S. & Busby, S. DNA sequence elements located immediately upstream of the -10 hexamer in *Escherichia coli* promoters: a systematic study. *Nucleic Acids Res.* **28**, 1864-1870 (2000).
24. Sedlyarova, N. et al. sRNA-Mediated Control of Transcription Termination in *E. coli*. *Cell* **167**, 111-121 (2016).
25. Kriner, M.A., Sevostyanova, A. & Groisman, E.A. Learning from the Leaders: Gene Regulation by the Transcription Termination Factor Rho. *Trends Biochem. Sci.* **41**, 690-699 (2016).
26. Wilson, H.R., Kameyama, L., Zhou, J.G., Guarneros, G. & Court, D.L. Translational repression by a transcriptional elongation factor. *Genes Dev.* **11**, 2204-2213 (1997).
27. Wilson, H.R., Yu, D., Peters, H.K.r., Zhou, J.G. & Court, D.L. The global regulator RNase III modulates translation repression by the transcription elongation factor N. *EMBO J.* **21**, 4154-4161 (2002).
28. Squires, C.L., Greenblatt, J., Li, J., Condon, C. & Squires, C.L. Ribosomal RNA antitermination in vitro: requirement for Nus factors and one or more unidentified cellular components. *Proc Natl Acad Sci U S A* **90**, 970-4 (1993).
29. Aksoy, S., Squires, C.L., Squires, C. & Jul;159(1):260-4., J.B. Evidence for antitermination in *Escherichia coli* rRNA transcription. *J. Bacteriol.* **159**, 260-264 (1984).

30. Blattner, F.R. et al. The complete genome of *Escherichia coli* K-12. *Science* **277**, 1453-1474 (1997).
31. Stringer, A.M. et al. Genome-Scale Analyses of *Escherichia coli* and *Salmonella enterica* AraC Reveal Non-Canonical Targets and an Expanded Core Regulon. *J. Bacteriol.* **196**, 660-671 (2014).
32. Stringer, A.M. et al. FRUIT, a scar-free system for targeted chromosomal mutagenesis, epitope tagging, and promoter replacement in *Escherichia coli* and *Salmonella enterica*. *PLoS One* **7**, e44841 (2012).
33. Datsenko, K.A. & Wanner, B.L. One-step inactivation of chromosomal genes in *Escherichia coli* K-12 using PCR products. *Proc. Natl. Acad. Sci. USA* **97**, 6640-6645 (2000).
34. Chen, Q. & Kadner, R.J. Effect of altered spacing between *uhpT* promoter elements on transcription activation. *J. Bacteriol.* **182**, 4430-4436 (2000).
35. Guzman, L.-M., Belin, D., Carson, M.J. & Beckwith, J.R. Tight regulation, modulation, and high-level expression by vectors containing the arabinose P<sub>BAD</sub> promoter. *J. Bacteriol.* **177**, 4121-4130 (1995).
36. Edgar, R.C. MUSCLE: multiple sequence alignment with high accuracy and high throughput. *Nucleic Acids Res.* **32**, 1792-1797 (2004).
37. Galperin, M.Y., Makarova, K.S., Wolf, Y.I. & Koonin, E.V. Expanded microbial genome coverage and improved protein family annotation in the COG database. *Nucleic Acids Res.* **43**, D261-269 (2015).

**Figure 1. Transcription termination within *suhB* is dependent on Rho and Nus factors.** RNAP ( $\beta$ ) enrichment at *suhB* 5' and 3' regions was measured using ChIP-qPCR in wild-type MG1655, *boxA*(C4T/T6C),  $\Delta nusB$ , *nusE*(A12E) or *rho*(R66S) mutant strains. Values are normalised to signal at the 5' end of *suhB*. *x*-axis labels indicate qPCR amplicon position relative to *suhB*. Error bars represent  $\pm 1$  standard deviation from the mean (n=3). A schematic depicting *suhB* gene, the transcription start site (bent arrow) and *boxA* (grey rectangle) is shown below the graph. Horizontal black lines indicate the position of PCR amplicons.

**Figure 2. A functional BoxA in the 5' UTR of *suhB*.** (A) Sequence conservation of the 100 bp upstream of *suhB* and its homologues across 20 *Enterobacteriaceae* species. The transcription start site is indicated by a bent arrow, and the BoxA and S-D sequences are indicated. (B) List of *boxA* mutations that are associated with increased *suhB* expression. All single nucleotide changes are indicated by an arrow. Single underline indicates a mutation that was isolated in the absence of mutations anywhere else in the cloned region; other mutants included additional mutations outside the *boxA*. Double underline indicates that the *boxA* mutation was isolated in two or more independent clones. Critical position "4" is indicated (See Fig. S3). (C) SuhB association with the 5' end of *suhB* in wild-type ("wt") and *boxA* mutant ("boxA C4T/T6C") strains. SuhB-FLAG occupancy was measured by ChIP-qPCR using  $\alpha$ -FLAG antibody. Error bars represent  $\pm 1$  standard deviation from the mean (n=3).

**Figure 3. Nus factors repress translation of *suhB*, leading to Rho-dependent termination within the gene.**  $\beta$ -galactosidase activity of (A) transcriptional and (B) translational fusions of *suhB* to *lacZ* in wild-type cells,  $\Delta nusB$ , *nusE*(A12E), or *rho*(R66S) mutants. The *suhB-lacZ* fusion had either a wild-type ("wt") or mutant *boxA*. Data are normalized to levels in wild type cells. Error bars represent  $\pm 1$  standard deviation from the mean (n=3). Schematics of constructs used in these experiments are depicted above the graphs. (C) and (D) Western blots showing SuhB-FLAG protein levels in wild-type cells, *nusE*(A12E), *rho*(R66S) (C), and *boxA*(C4T/T6C)

mutants (D). SuhB-FLAG was probed with  $\alpha$ -FLAG antibody; RNAP  $\beta'$  was probed as a loading control. Representative blots from at least three independent experiments are shown.

**Figure 4. The effect on *suhB-lacZ* transcription levels of altering the distance between *boxA* and the S-D sequence.** (A)  $\beta$ -galactosidase activity of wild-type (“wt *boxA*”; dark grey bars) and *boxA* mutant (“C4A”; light grey bars) transcriptional fusions of *suhB* to *lacZ*, with increasing lengths of non-coding DNA inserted between the *boxA* and S-D sequences. The length of inserted sequence (nt) is indicated on the *x*-axis. Constructs include 200 bp of upstream sequence and a full length *suhB* fused to *lacZ* in the pAMD-BA-*lacZ* plasmid. Note that the sequence of inserted non-coding DNA differs for constructs with insertion sizes of  $\leq 32$  bp and  $\geq 40$  bp (see Methods for details). (B) *suhB-lacZ* levels when *suhB* is transcribed by T7 RNAP. Bacterial cells carried a plasmid with a *suhB-lacZ* translational fusion, and either an empty pBAD18 vector or pBAD18 with T7 RNAP.  $\beta$ -galactosidase activity was measured for cells grown in the presence of 0.2% arabinose to induce T7 RNAP expression. Schematics of the constructs used for these experiments are depicted below the graphs.

**Figure 5. Identification of BoxA elements in other bacterial species.** (A-D) RNAP ( $\beta$ ) (A and C) and SuhB-FLAG (B and D) association with *thyA*, *hisG* and *suhB* was measured using ChIP-qPCR in a derivative of *S. Typhimurium* strain 14028s in which *thyA* was deleted at its native locus, and *hisG* was disrupted by insertion of *thyA*, replacing the first 3 (A and B) or 100 (C and D) nucleotides of *hisG*. *x*-axis labels indicate the qPCR amplicon used, with numbers corresponding to the schematics above the graphs. Error bars represent  $\pm 1$  standard deviation from the mean ( $n=3$ ). In the schematic, the *suhB boxA* and the putative *hisG boxA* are indicated by grey rectangles. Numbers above the arrows represent nucleotide positions relative to the *hisG* gene start (without *thyA* insertion). Horizontal black lines indicate the positions of PCR amplicons. (E)  $\beta$ -galactosidase activity of wild-type (“wt *boxA*”; white bars) and *boxA* mutant (“C4A”; grey bars) transcriptional fusions of *CKO\_00699* (R82A mutant, to avoid potential toxicity to *E. coli* in the absence of the anti-toxin) to



38 *lacZ* in *E. coli* wild-type (“wt”) or *nusB* deletion (“ $\Delta nusB$ ”) strains. *CKO\_00699-lacZ* expression was driven by  
 39 a constitutive promoter (Burr et al., 2000). Error bars represent  $\pm 1$  standard deviation from the mean (n=3).

**Figure 1**

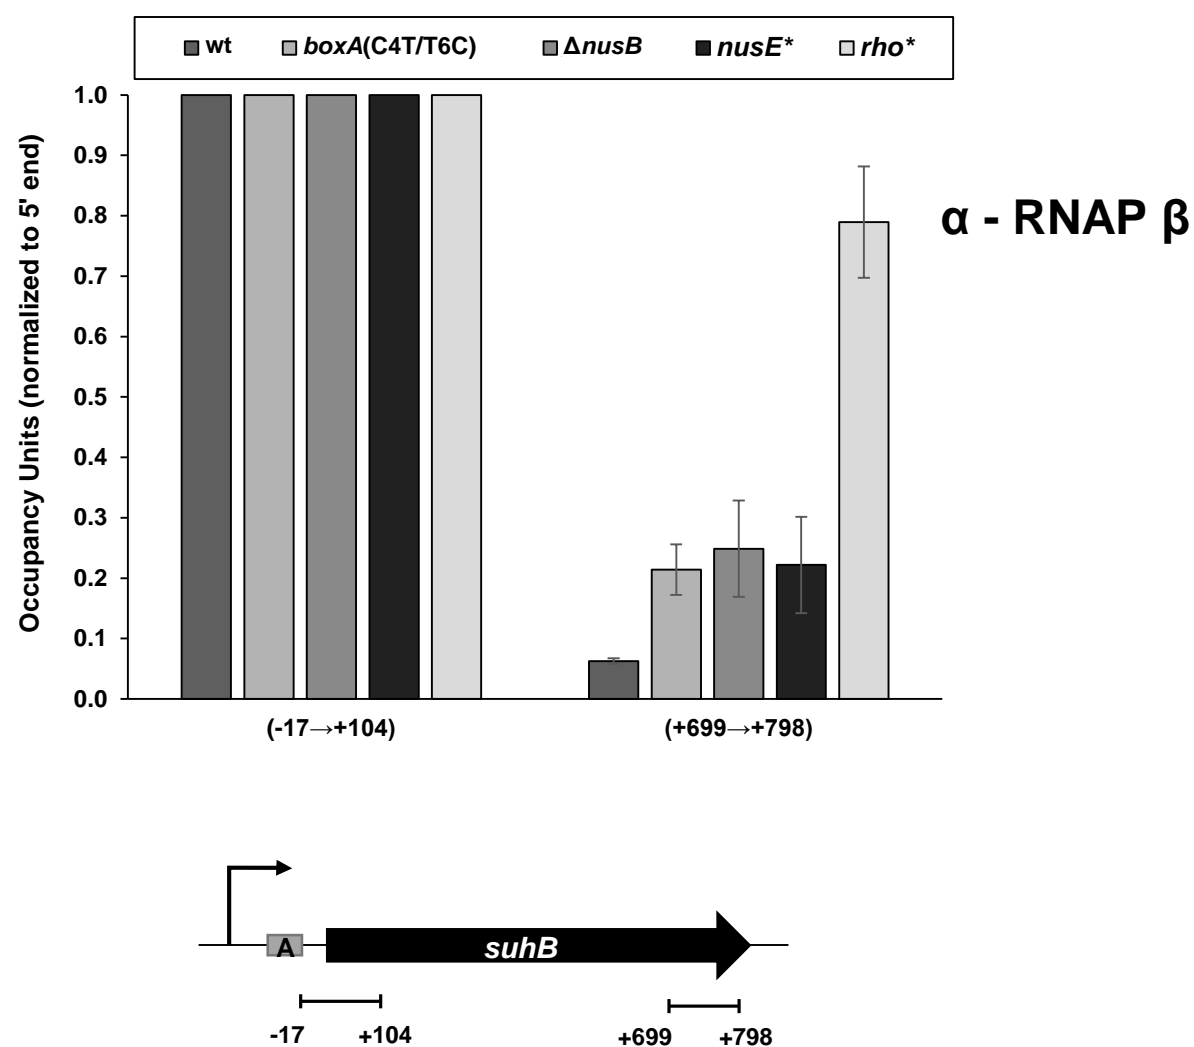

**Figure 2**

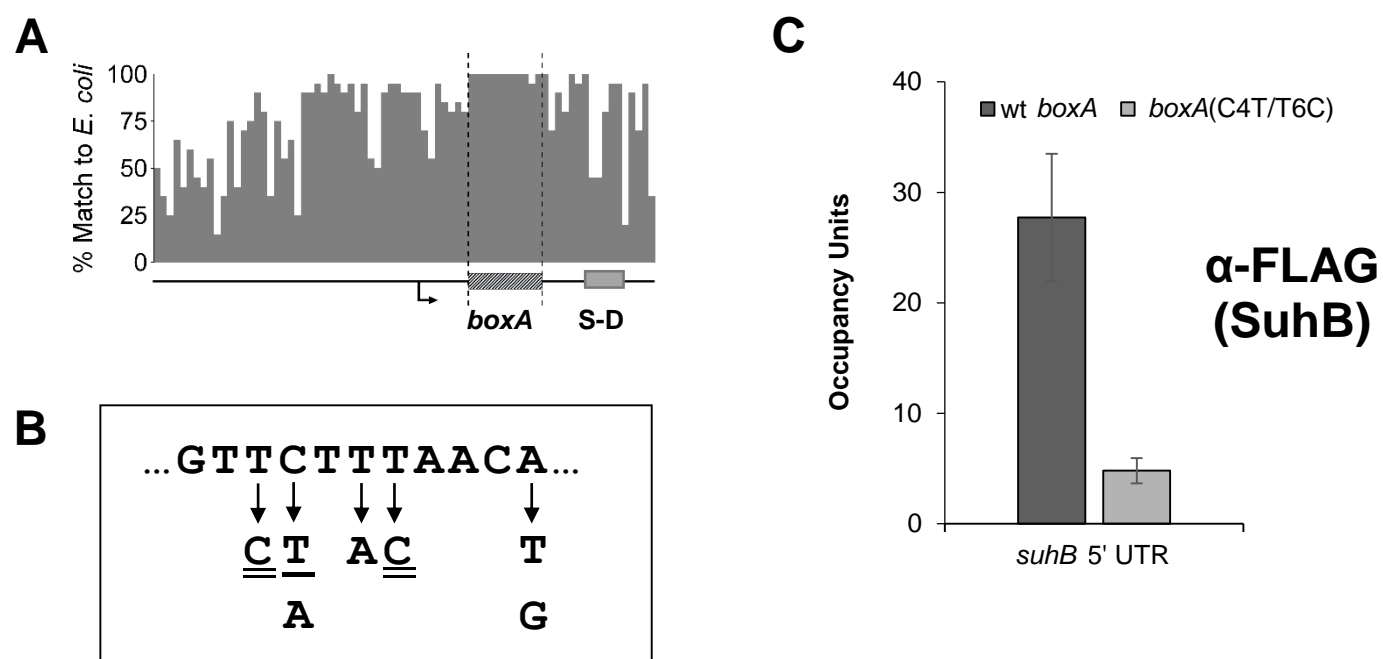

**Figure 3**

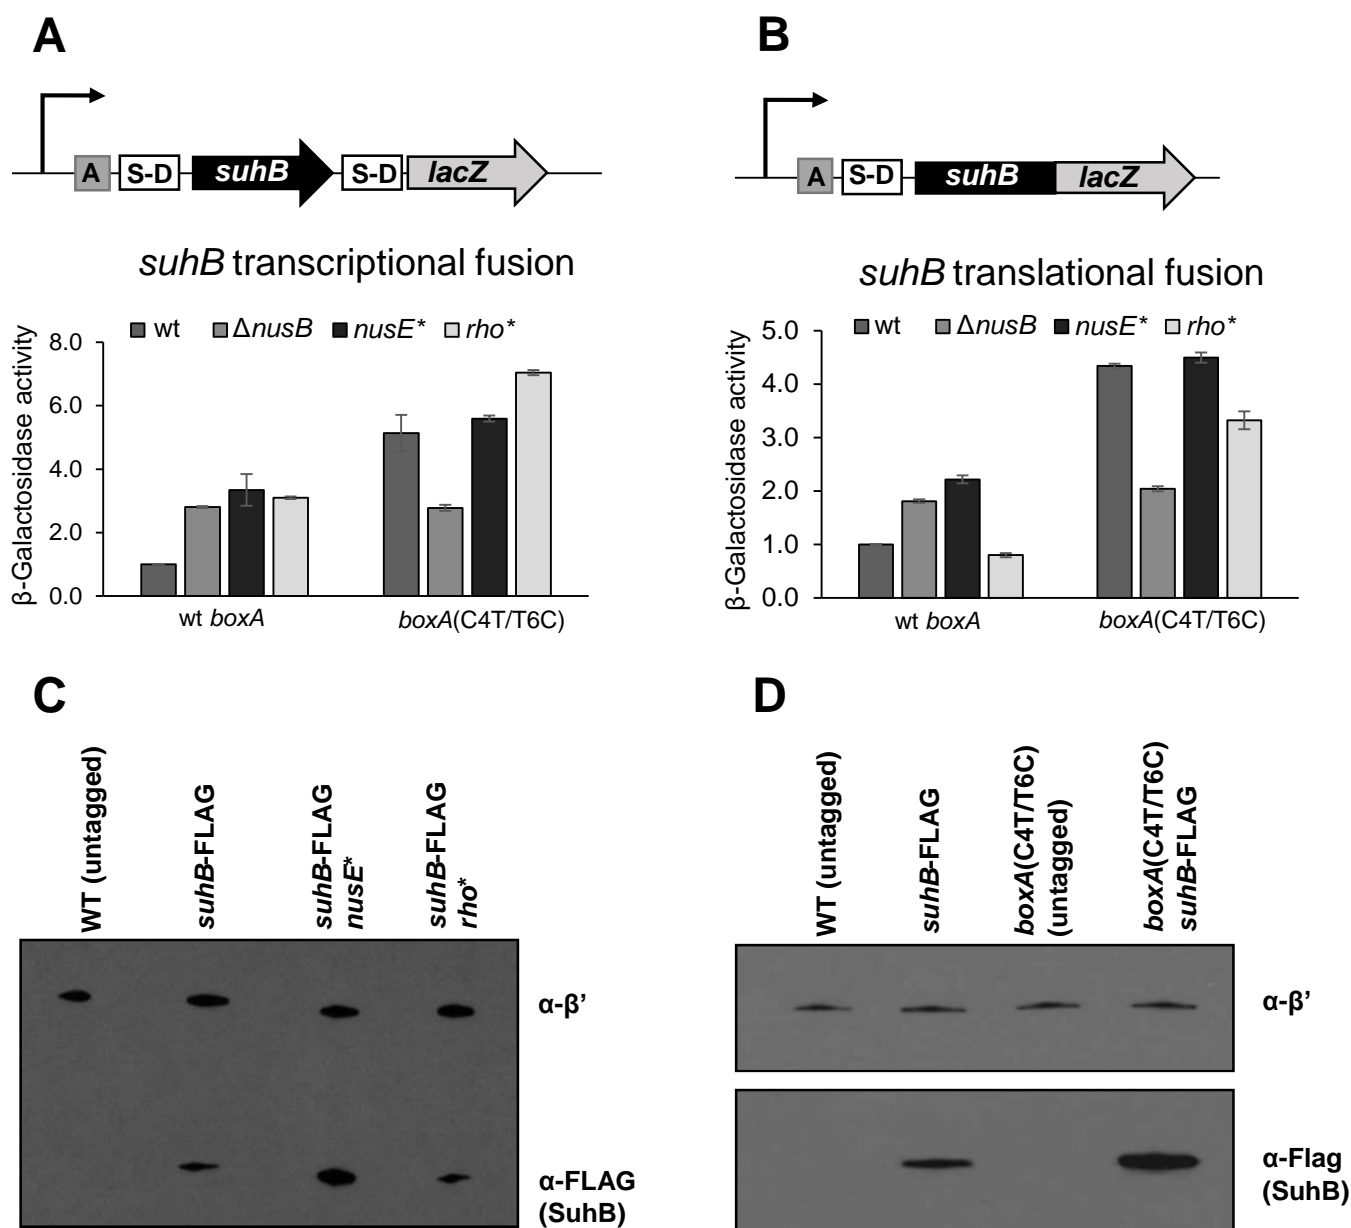

**Figure 4**

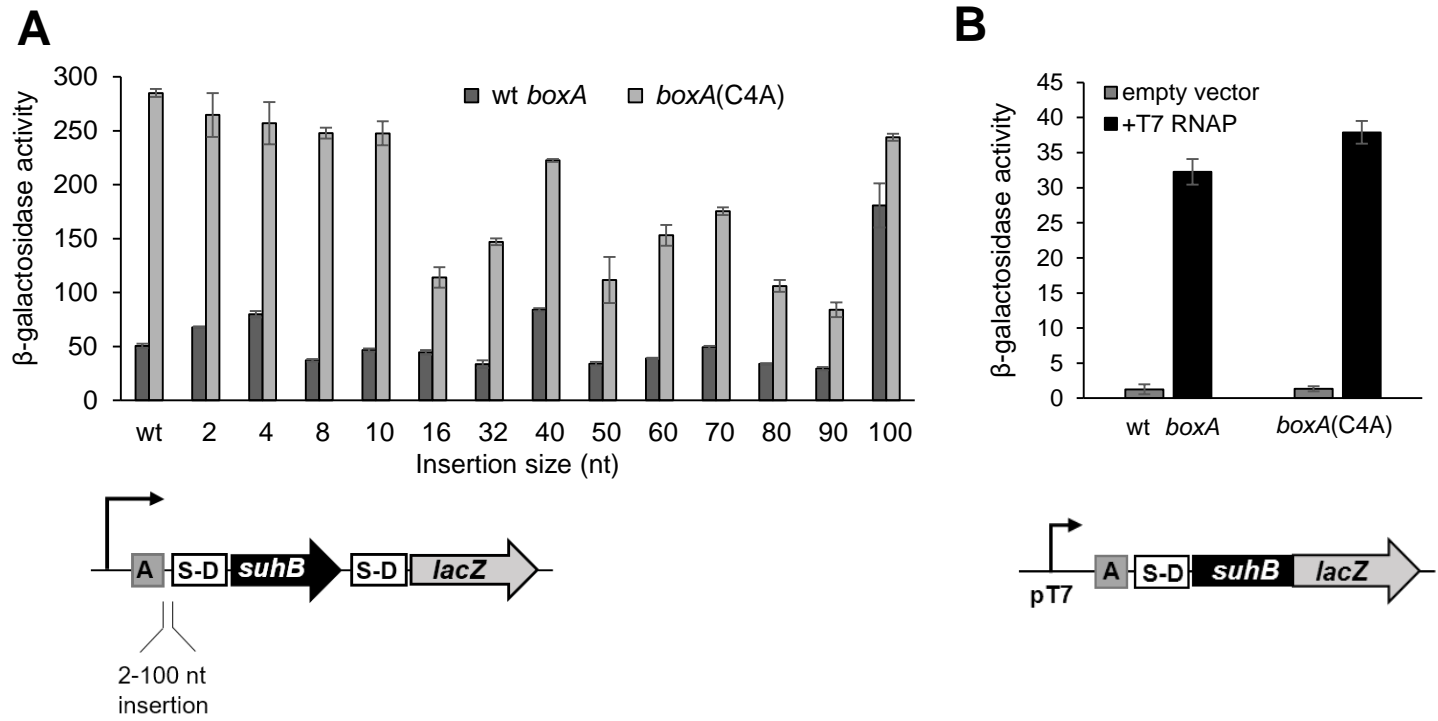

**Figure 5.**

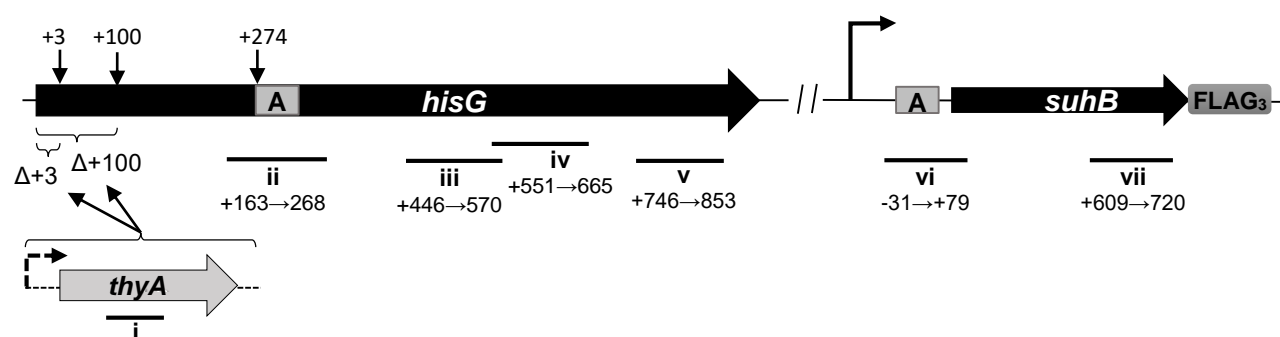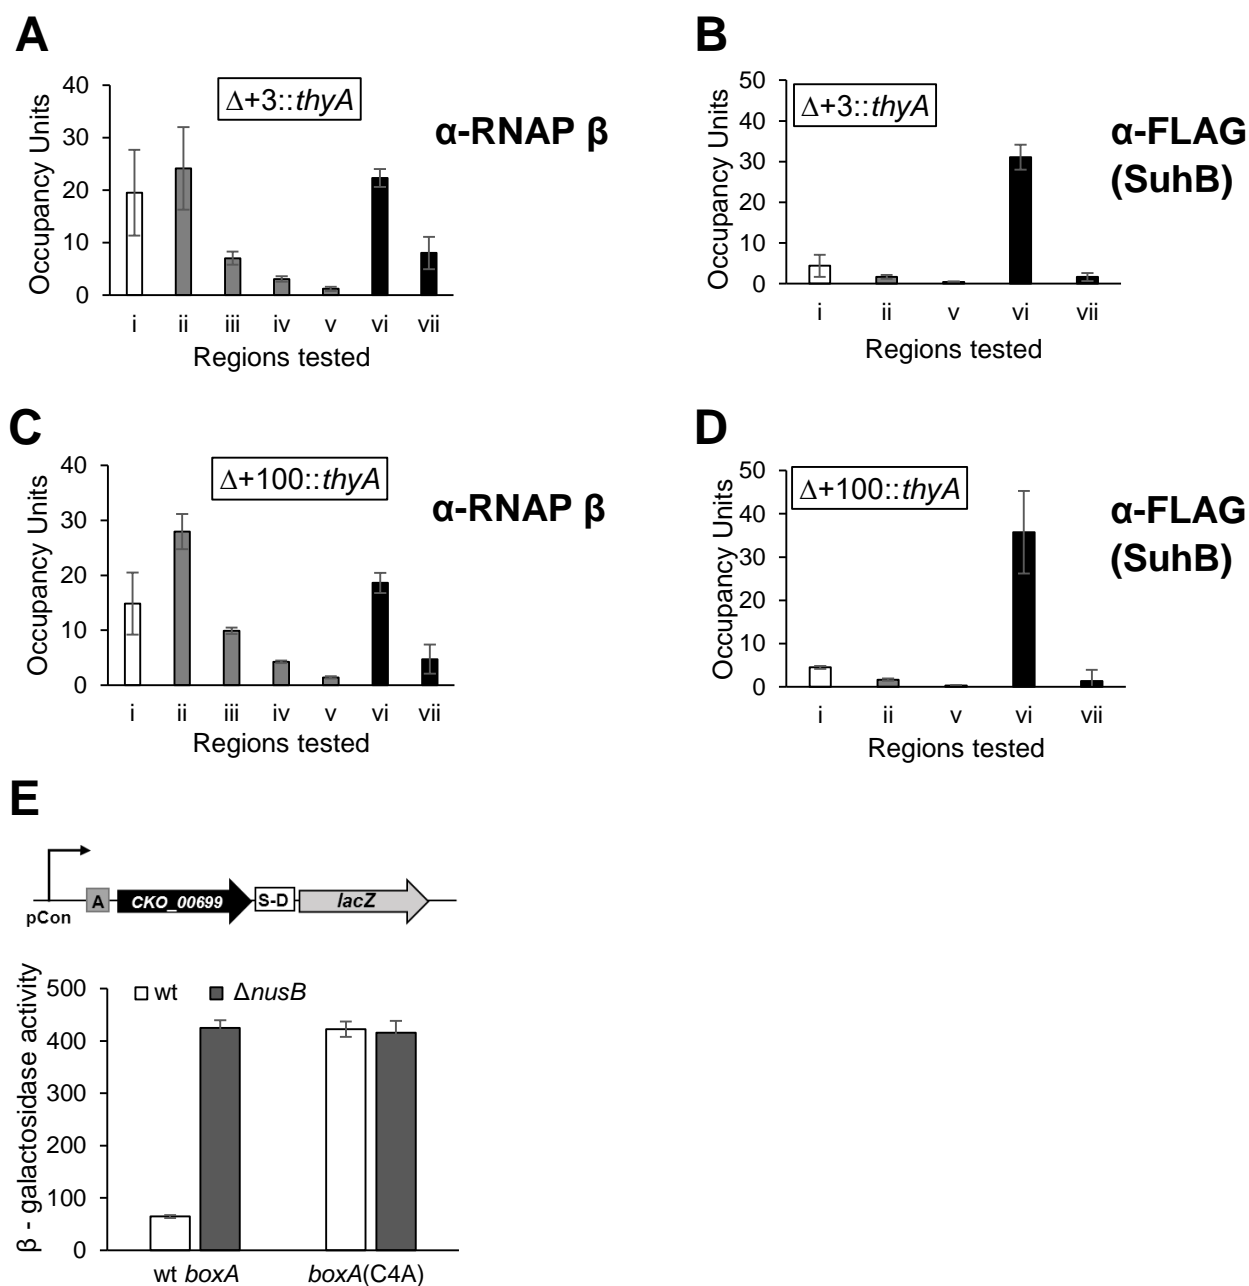

Source: https://www.biorxiv.org/content/10.1101/091223v1.full.pdf
